# Supplementary material for: Nicotinamide Mononucleotide Attenuates Renal Interstitial Fibrosis After AKI by Suppressing Tubular DNA Damage and Senescence
Source: PubMed Central journal article supplement (PMC8021789; doi:10.3389/fphys.2021.649547), 2021-03-23
Supplement: Presentation_1.pdf [file Presentation_1.pdf]

Captions for supplementary figures:

**Supplementary Figure 1. Nicotinamide Mononucleotide (NMN) attenuated hypoxia-reoxygenation induced injuries in HK-2 cells.** (A-B) Flow cytometry analysis of  $\gamma$ H2A.X(ser139) of HK-2 cells after subjected to hypoxia for 12 hours followed by 12 hours reoxygenation (H12/R12), and bar graph showed decreased DNA damage in NMN-treated group. (C-D) Decreased percentage of SA- $\beta$ -gal positive cells in NMN-treated group after subjected to hypoxia for 48 hours followed by 12 hours reoxygenation (H48/R12). (E-F) Western blots analysis showed reduction of collagen IV in NMN-treated groups after 48 hours hypoxia followed by 12 hours reoxygenation (H48/R12).

**Supplementary Figure 2. NAD<sup>+</sup> levels in the contralateral and ischemic kidney tissues of uIRI mice given PBS or NMN.** n=6/group. data are means $\pm$ SD.
